# Supplementary material for: Anti-proliferative and anti-migratory properties of coffee diterpenes kahweol acetate and cafestol in human renal cancer cells
Source: PubMed Central journal article supplement (PMC7804192; doi:10.1038/s41598-020-80302-4), 2021-01-12

## **Anti-proliferative and anti-migratory properties of coffee diterpenes kahweol acetate and cafestol in human renal cancer cells**

Tomoyuki Makino<sup>1</sup>, Kouji Izumi<sup>1,\*</sup>, Kaoru Hiratsuka<sup>1</sup>, Hiroshi Kano<sup>1</sup>, Takafumi Shimada<sup>1</sup>, Taito Nakano<sup>1</sup>, Suguru Kadomoto<sup>1</sup>, Renato Naito<sup>1</sup>, Hiroaki Iwamoto<sup>1</sup>, Hiroshi Yaegashi<sup>1</sup>, Kazuyoshi Shigehara<sup>1</sup>, Yoshifumi Kadono<sup>1</sup>, Hiroki Nakata<sup>2</sup>, Yohei Saito<sup>3</sup>, Kyoko Nakagawa-Goto<sup>3</sup>, Norihiko Sakai<sup>4</sup>, Yasunori Iwata<sup>4</sup>, Takashi Wada<sup>4</sup>, and Atsushi Mizokami<sup>1</sup>

1. Department of Integrative Cancer Therapy and Urology, Kanazawa University Graduate School of Medical Science, Kanazawa, Japan
2. Department of Histology and Cell Biology, Kanazawa University Graduate School of Medical Science, Kanazawa, Japan
3. School of Pharmaceutical Sciences, College of Medical, Pharmaceutical and Health Science, Kanazawa University, Kanazawa, Japan
4. Department of Nephrology and Laboratory Medicine, Kanazawa University, Kanazawa, Japan.

### **\*Correspondence to:**

Kouji Izumi, M.D., Ph.D., Department of Integrative Cancer Therapy and Urology, Kanazawa University Graduate School of Medical Science, 13-1 Takara-machi, Kanazawa, Ishikawa 920-8640, Japan.

Tel: +81-76-265-2393, Fax: +81-76-234-4263, E-mail: [azuizu2003@yahoo.co.jp](mailto:azuizu2003@yahoo.co.jp)

**Supplementary Figure S1.** Anti-proliferative effects of kahweol acetate and cafestol on normal kidney cell; proximal tubular cells from normal adult human kidney (HK-2).

Cell proliferation assay

Human renal normal HK-2 cells were seeded in 12-well plates ( $5 \times 10^4$  cells/well) with DMEM containing 10% FBS. Each cells treated with or without pre-determined concentration of kahweol acetate and cafestol for 24 h. Cells were harvested and cell numbers were counted using a haemocytometer. Data are shown as means  $\pm$  standard error of the mean (SEM) (n = 3). \*\*\*\*P < 0.0001.

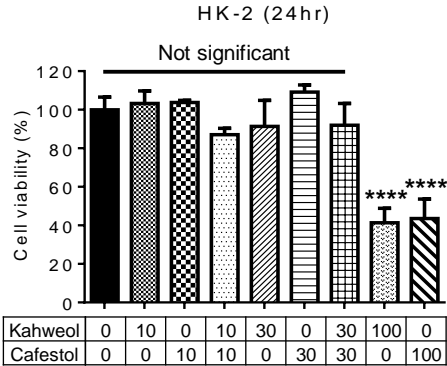

## Supplementary Figure S2. Wound healing assay to additionally check the anti-migrative effect of kahweol acetate and cafestol on renal cancer cells.

Wound healing assay was performed using 12-well plates. ACHN and Caki-1 cells were let to grow until 90% confluence. A single wound was then scratched in the center of the cell monolayers with a 200- $\mu$ l sterile plastic pipette tip. Subsequently, cells were incubated with treatment of kahweol acetate and cafestol in RPMI containing 10% FBS for another 12 h. The wound closure area was measured by fluorescence microscope (Keyence, Osaka, Japan). Bar in pictures, 500  $\mu$ m. Data are shown as means  $\pm$  SEM (n = 3). \*P < 0.05; \*\*P < 0.01. #Synergistic effects are observed.

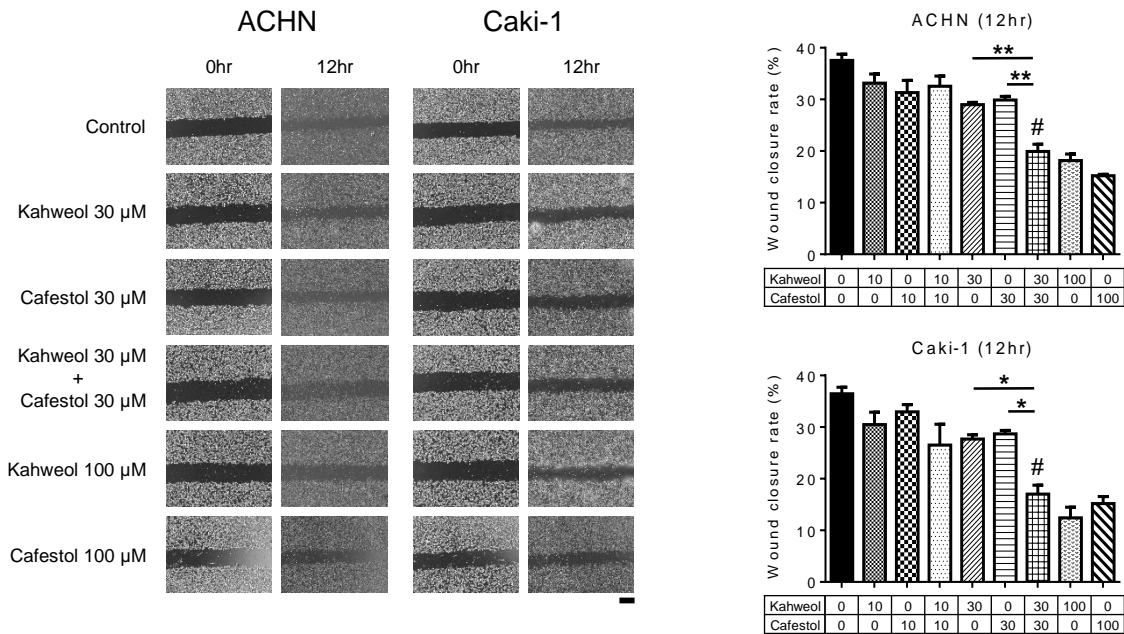

**Supplementary Figure S3.** Western blot analyses of pro-apoptotic protein, Bax.

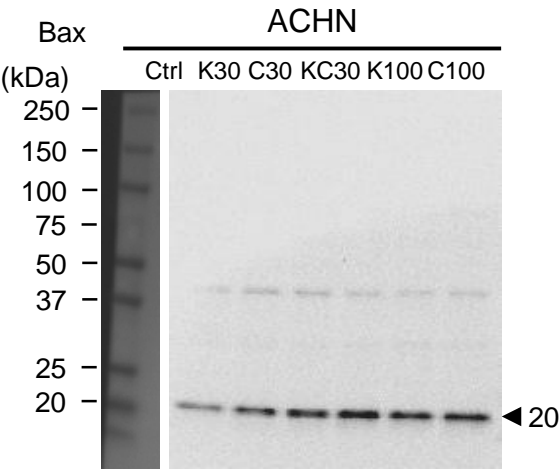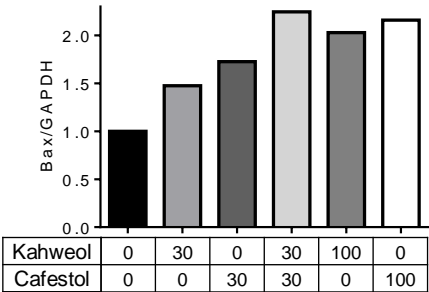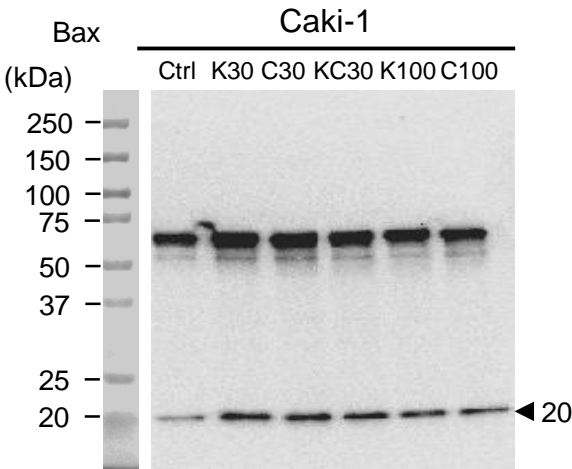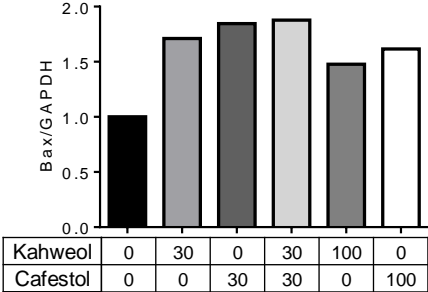

**Supplementary Figure S4.** Western blot analyses of the apoptosis-related proteins, cleaved caspase-3 and cleaved PARP.

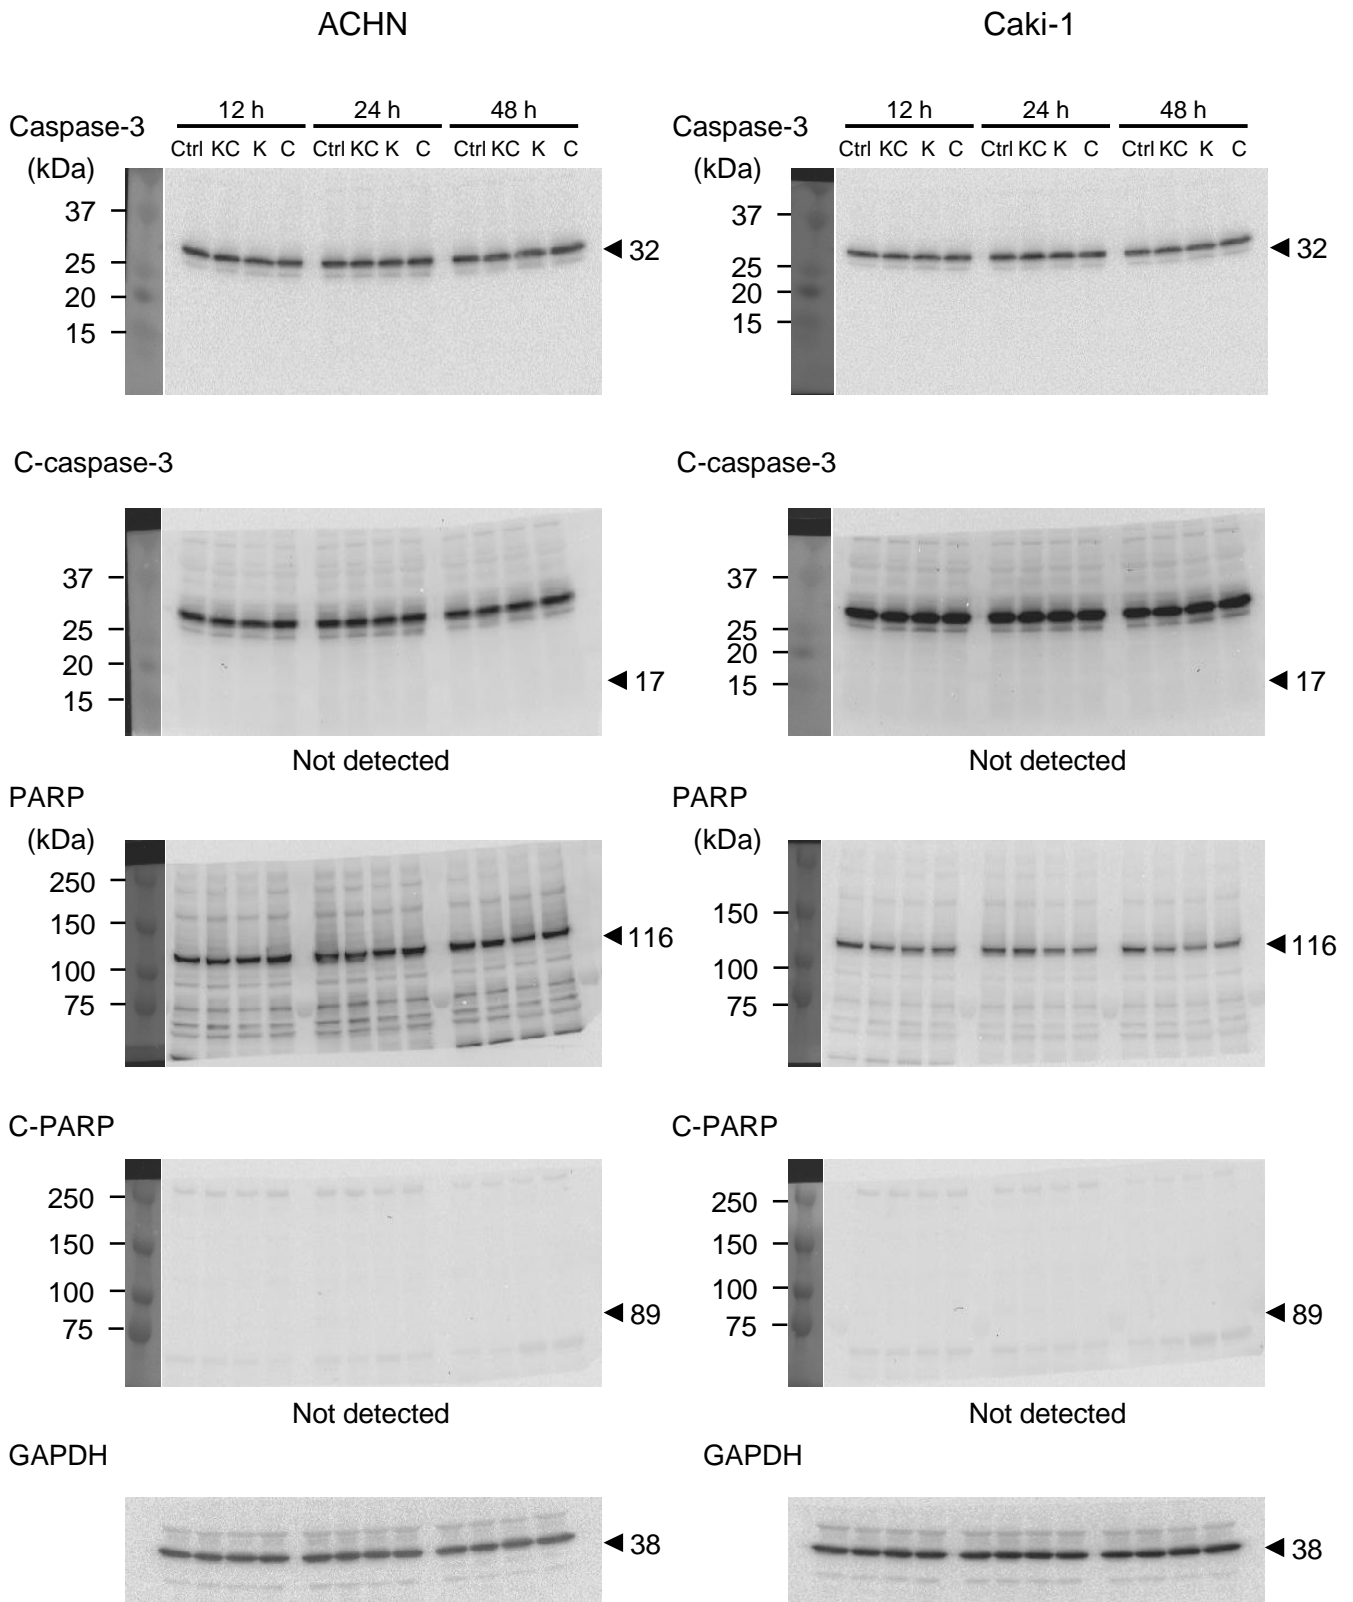

Ctrl: Control, KC: Kahweol 30  $\mu$ M + Cafestol 30  $\mu$ M, K: Kahweol 100  $\mu$ M, C: Cafestol 100  $\mu$ M

**Supplementary Figure S5.** Western blot analyses of the other EMT-related proteins.

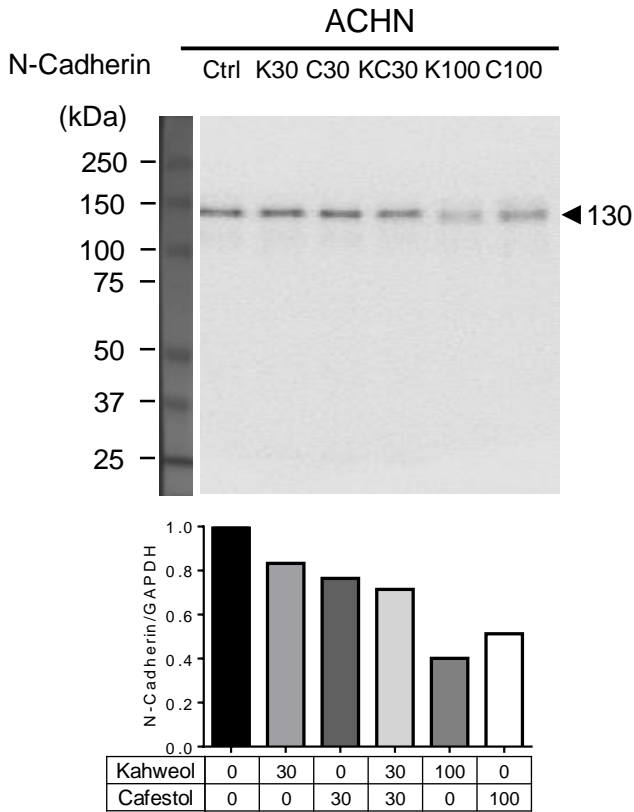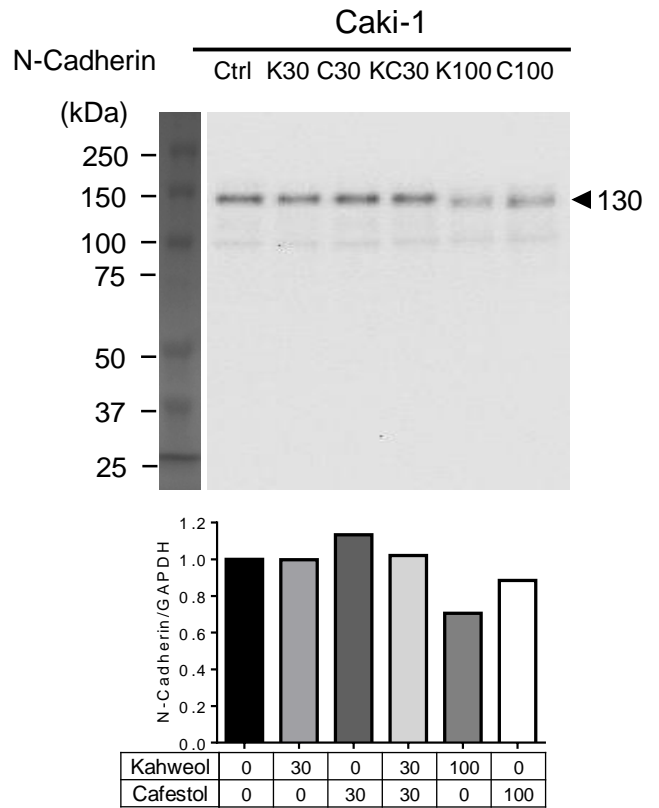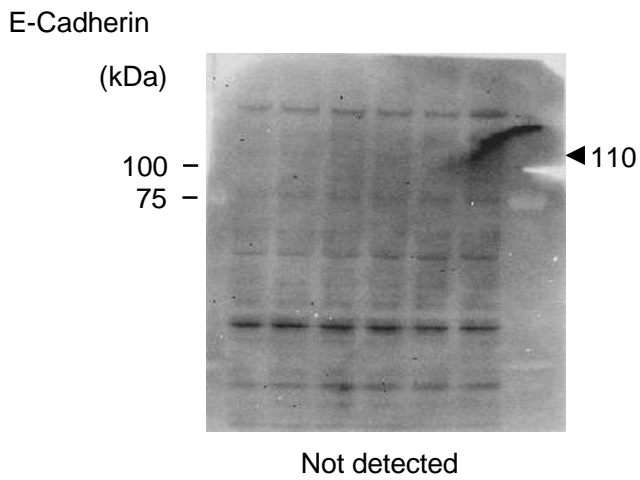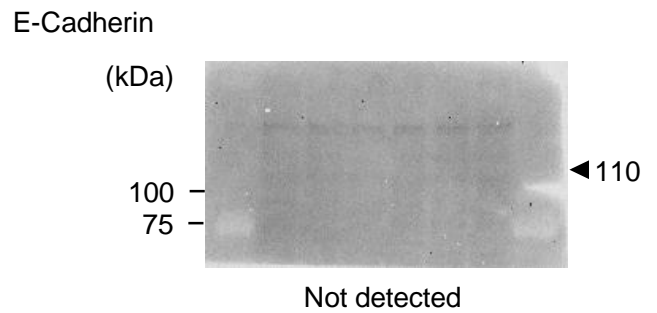

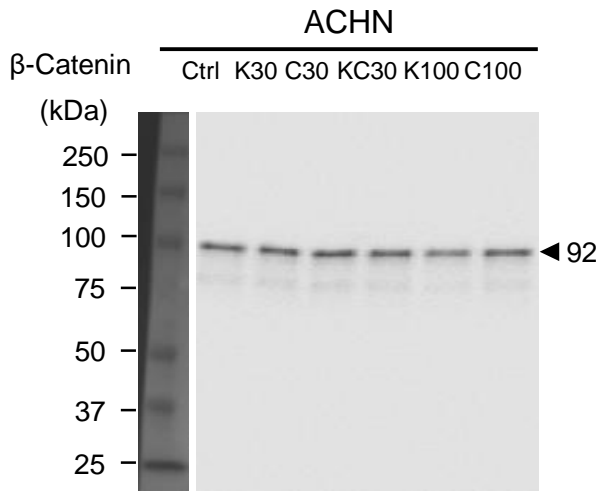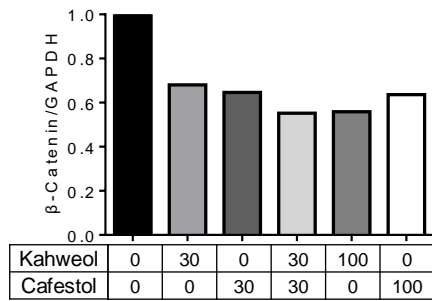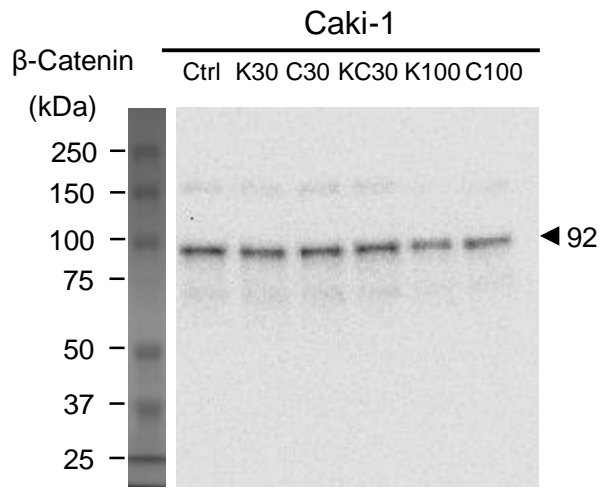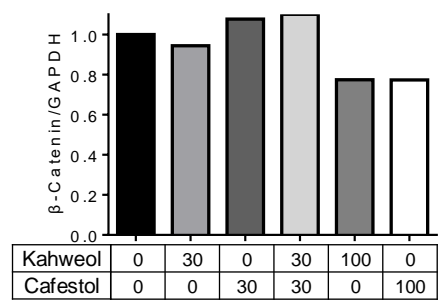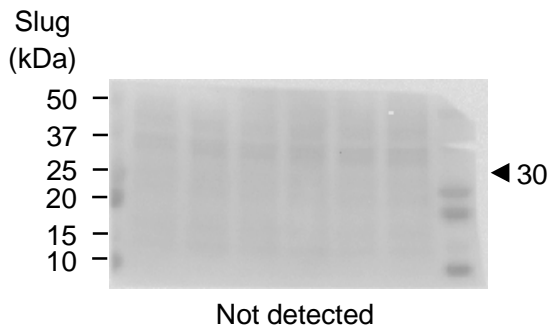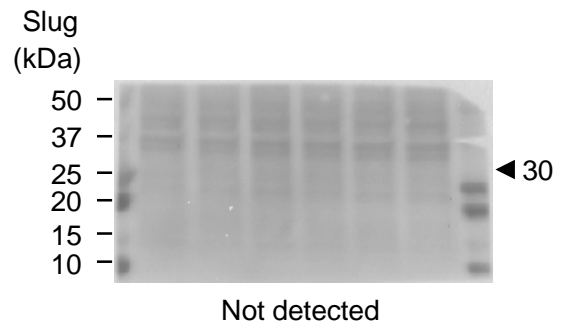

**Supplementary Figure S6.** Antibody information used in western blot analyses for Supplementary Figures.

| Antibodies                                    | Predicted molecular weight (kDa) | Purchase source                              |
|-----------------------------------------------|----------------------------------|----------------------------------------------|
| rabbit anti-Caspase-3 (ab32351)               | 32                               | Abcam (Cambridge, MA, USA)                   |
| rabbit anti-Cleaved Caspase-3 (9661S)         | 17                               | Cell Signaling Technology (Danvers, MA, USA) |
| rabbit anti-PARP (9532S)                      | 116                              | Cell Signaling Technology                    |
| rabbit anti-Cleaved PARP (5625S)              | 89                               | Cell Signaling Technology                    |
| rabbit anti-Bax (2772S)                       | 20                               | Cell Signaling Technology                    |
| mouse anti-E-cadherin (ab1416)                | 110                              | Abcam                                        |
| rabbit anti-N-cadherin (22018-1-AP)           | 130                              | Proteintech (Rosemont, IL, USA)              |
| rabbit anti- $\beta$ -Catenin (D10A8) (8480S) | 92                               | Cell Signaling Technology                    |
| rabbit anti-Slug (C19G7) (9585S)              | 30                               | Cell Signaling Technology                    |



**Supplementary Figure S7.** Full length images of cropped blots presented in Figures 2, 3, 4, and 5.

**Figure 2**

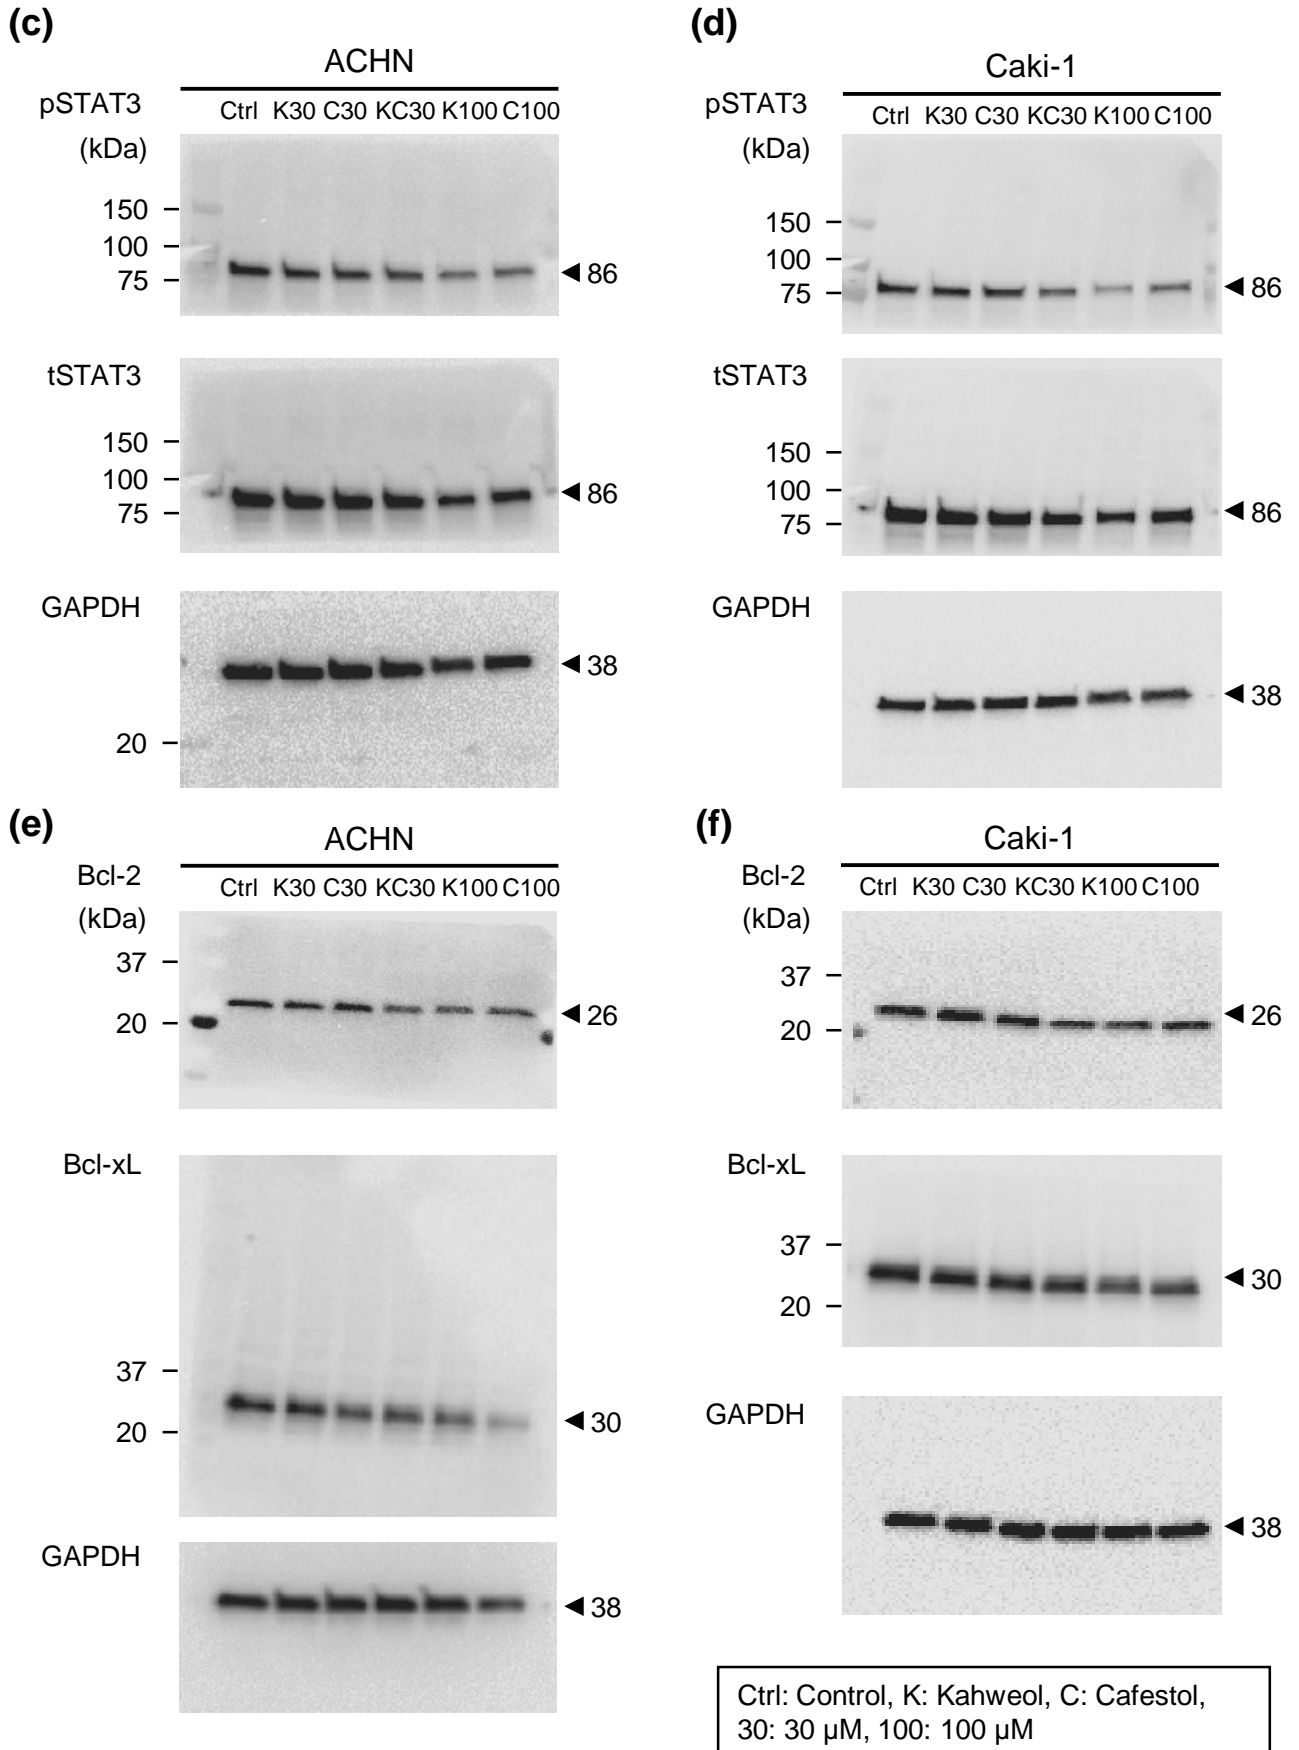

**Figure 3**

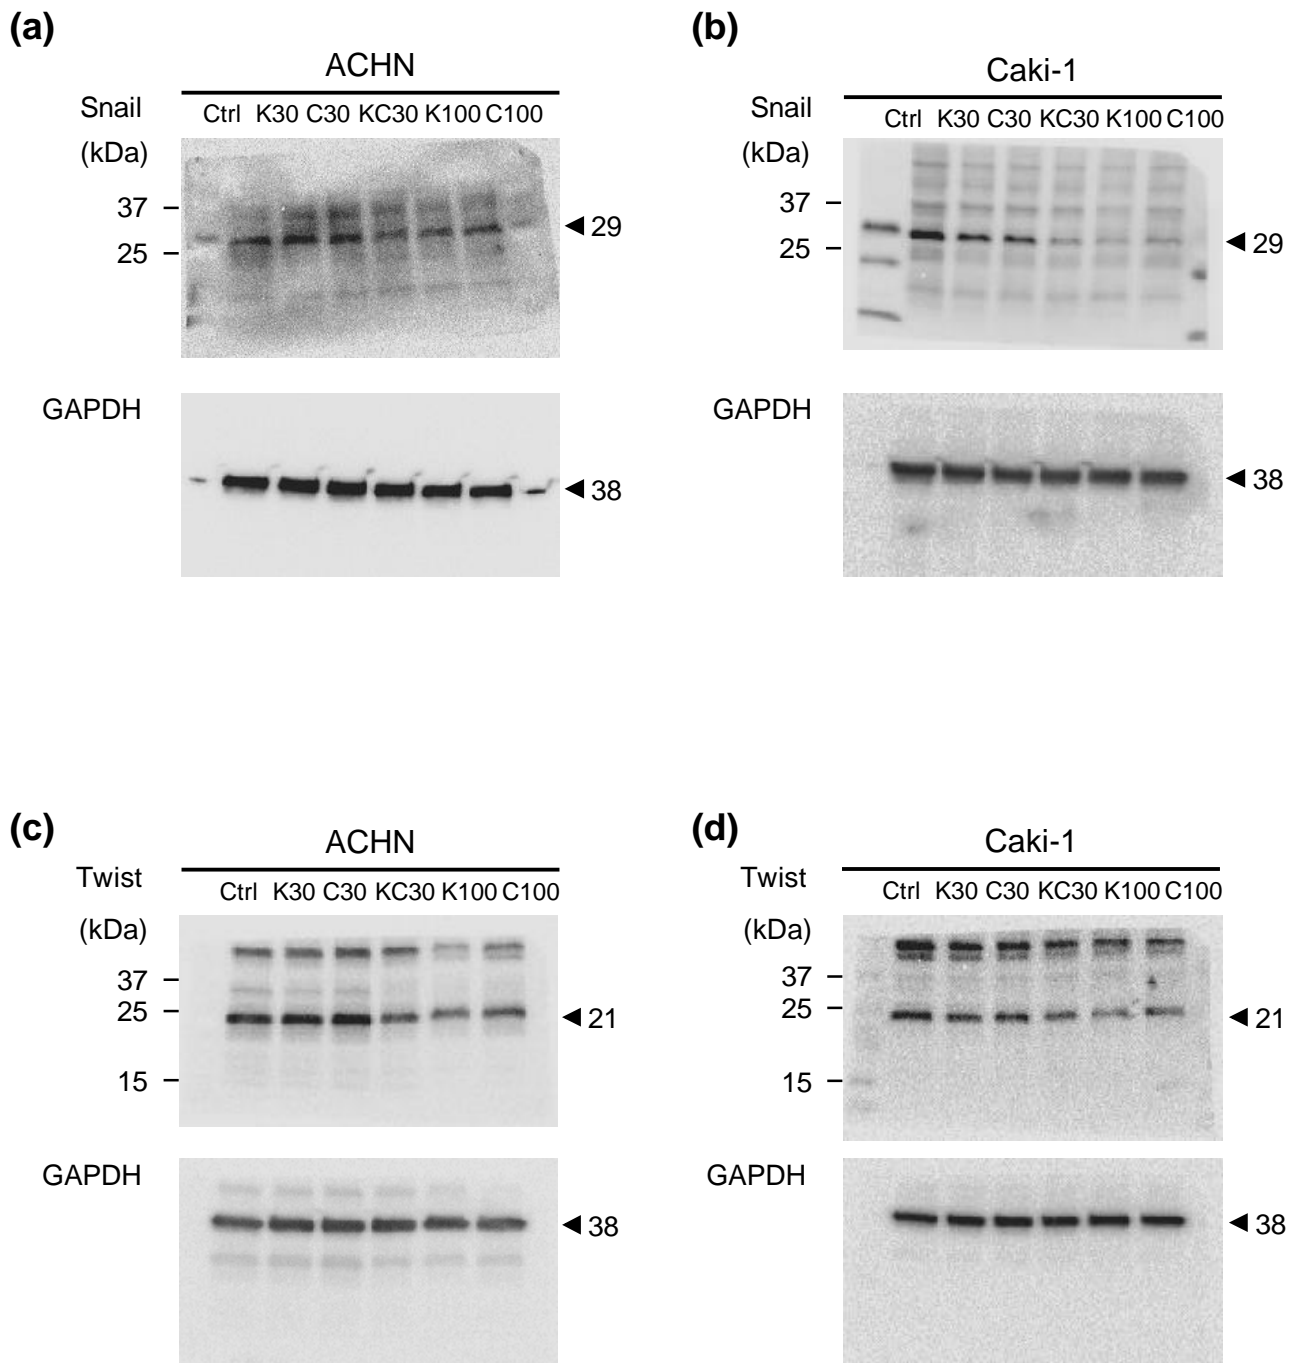

**Figure 4**

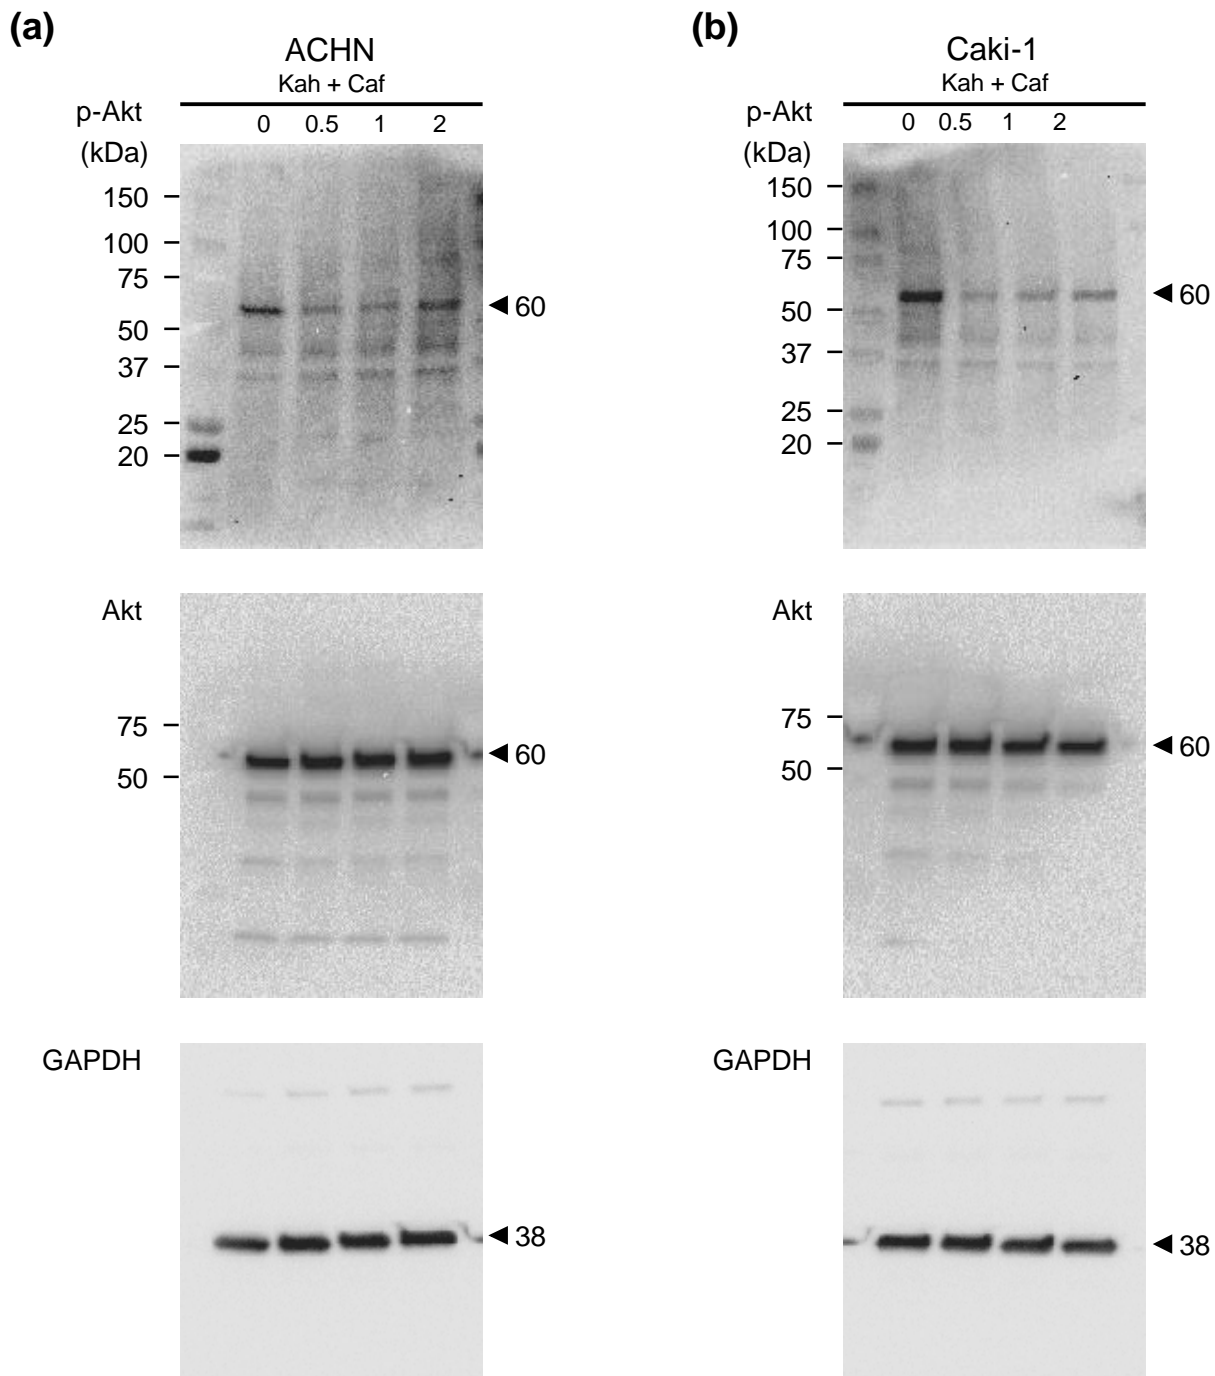

**Figure 4 continue**

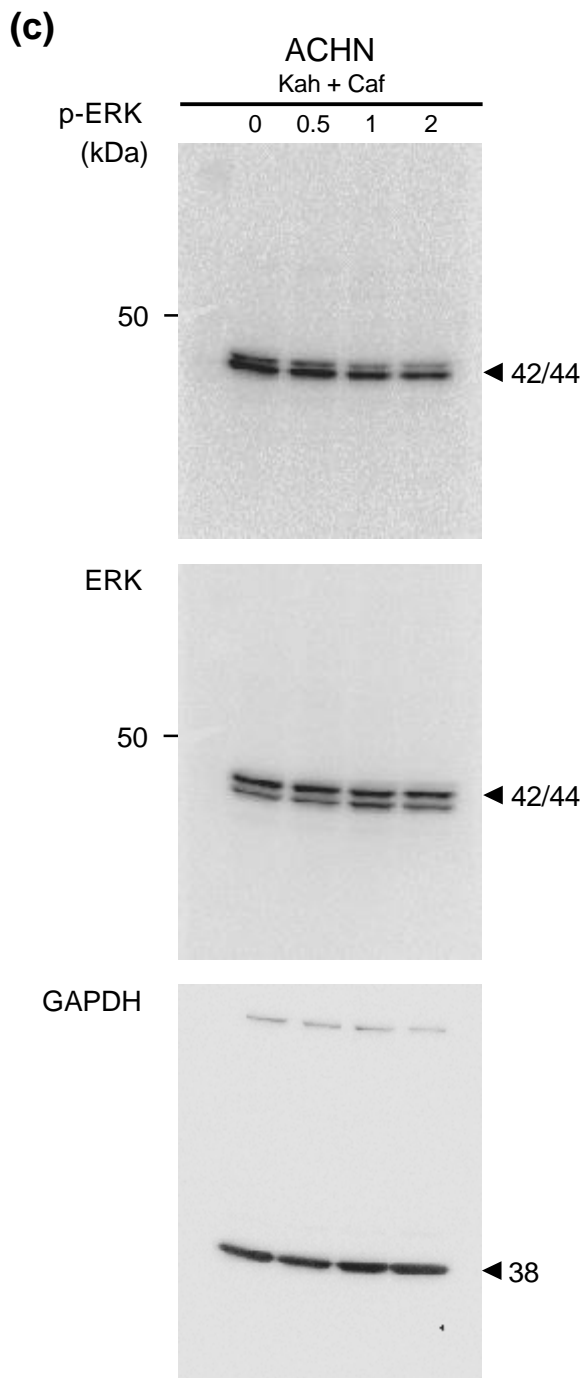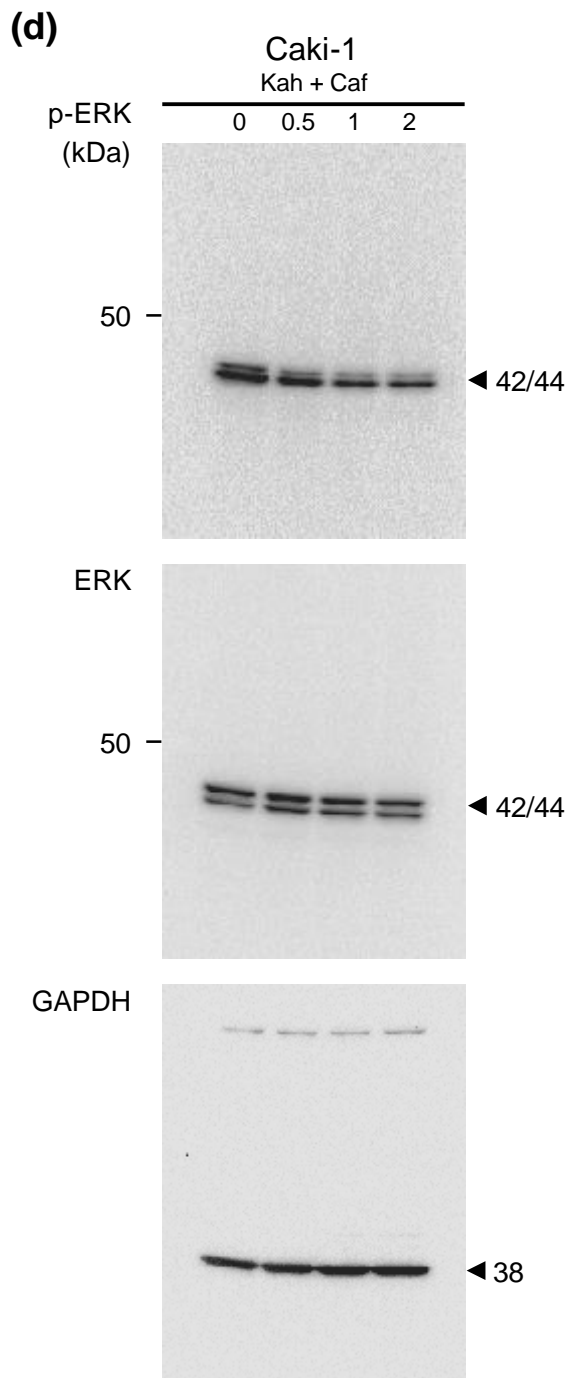

**Figure 5**

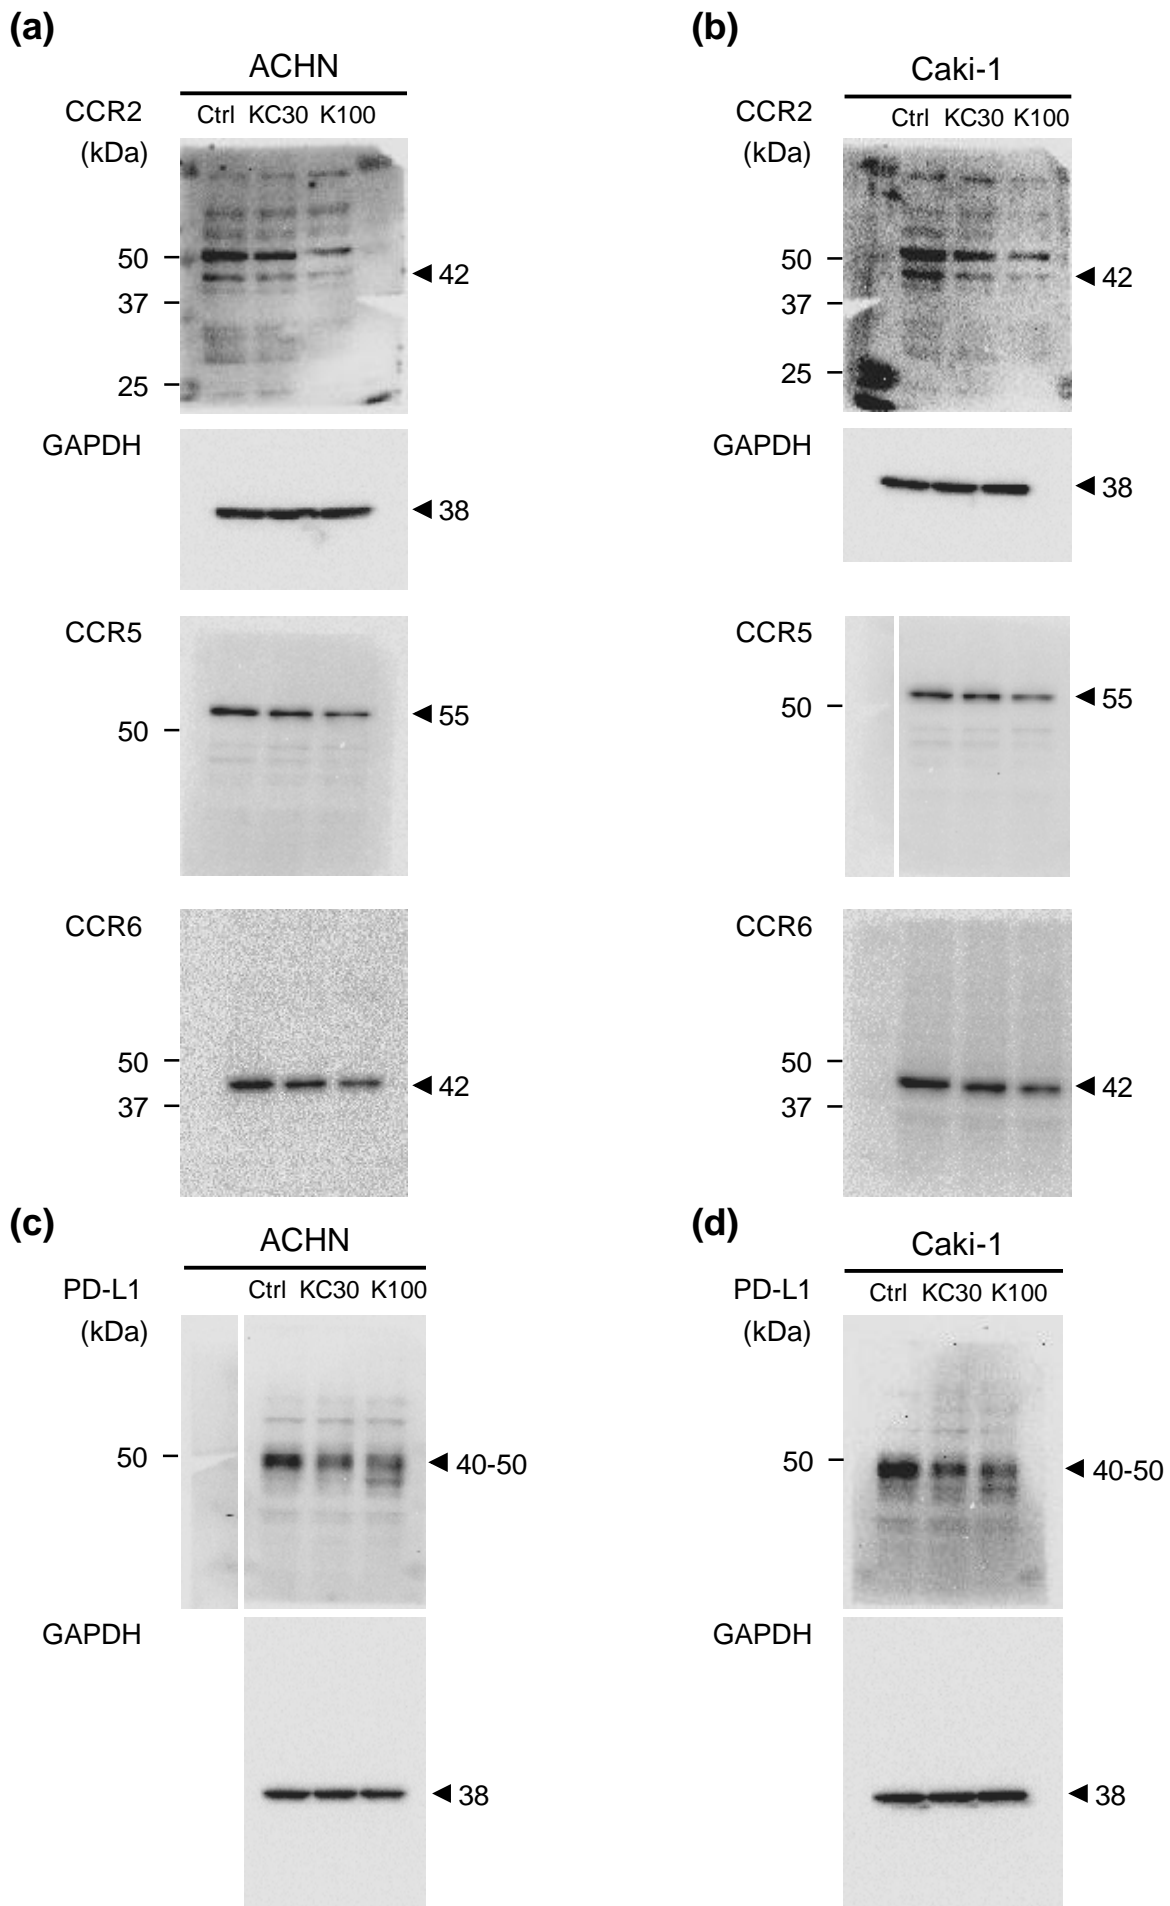

Supplement: 41598_2020_80302_MOESM1_ESM.pdf [file 41598_2020_80302_MOESM1_ESM.pdf]
